# Supplementary material for: Synthesis of easily shaped ordered mesoporous titanium-containing silica
Source: Royal Society of Chemistry journal article supplement (doi:10.1039/b925864g), 2010-01-01

## Supplementary Data

# Synthesis of easily shaped ordered mesoporous titanium-containing silica

Chao Yu<sup>#,a</sup>, Huaqin Chu<sup>#,a</sup>, Ying Wan<sup>\*,a</sup>, Dongyuan Zhao<sup>b</sup>

<sup>a</sup>Department of Chemistry, Shanghai Normal University, Shanghai 200234, P. R.

China; <sup>b</sup> Department of Chemistry and Shanghai Key Laboratory of Molecular  
Catalysis and Innovative Materials, Fudan University, Shanghai 200433, P. R. China

\* To whom correspondence should be addressed. Tel: 86-21-6432-2516;

Fax: 86-21-6432-2511; E-mail: [ywan@shnu.edu.cn](mailto:ywan@shnu.edu.cn)

# The two authors contribute the same.

Fig. S1 *t*-plot analysis for (a) as-prepared Ti-containing mesoporous silicates TiCl-MS(AP) and (b) calcined TiCl-MS materials with different Si/Ti ratios prepared from TiCl<sub>3</sub> and as-prepared SBA-15 mesoporous silica by grafting.

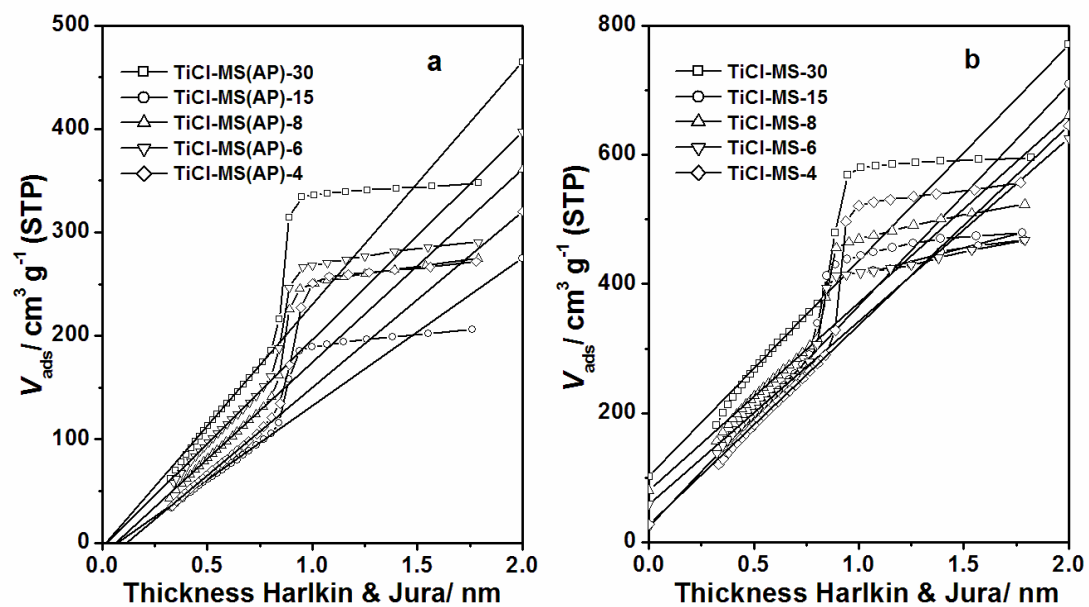

Fig. S2 Optical photos for (a) as-prepared mesoporous silica, (b) as-prepared Ti-containing mesoporous silica synthesized with  $\text{TiOSO}_4$  (TiSO-MS(AP)-15) and (c) calcined TiSO-MS-15.

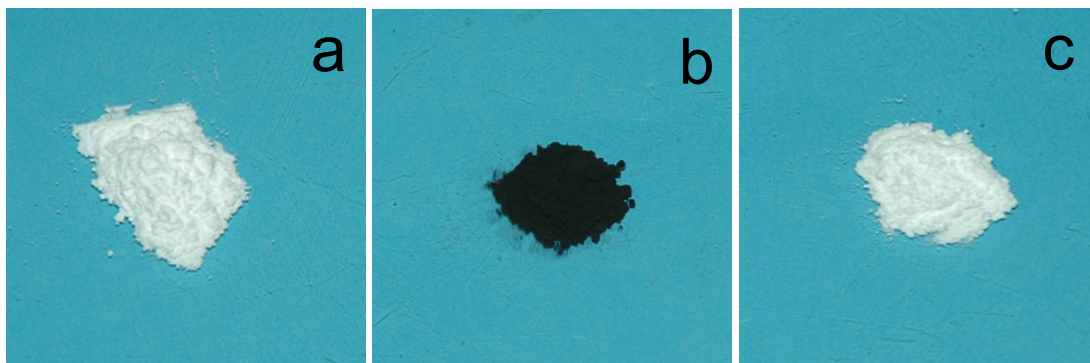

Fig. S3 (a) Small-angle XRD pattern and (b) N<sub>2</sub> sorption isotherms for calcined Ti-containing mesoporous silicates TIPOT-MS-30 materials with the Si/Ti ratio of 30 prepared with TIPOT and as-prepared mesoporous silica *via* grafting. Inset (b) is corresponding pore-size distribution curve.

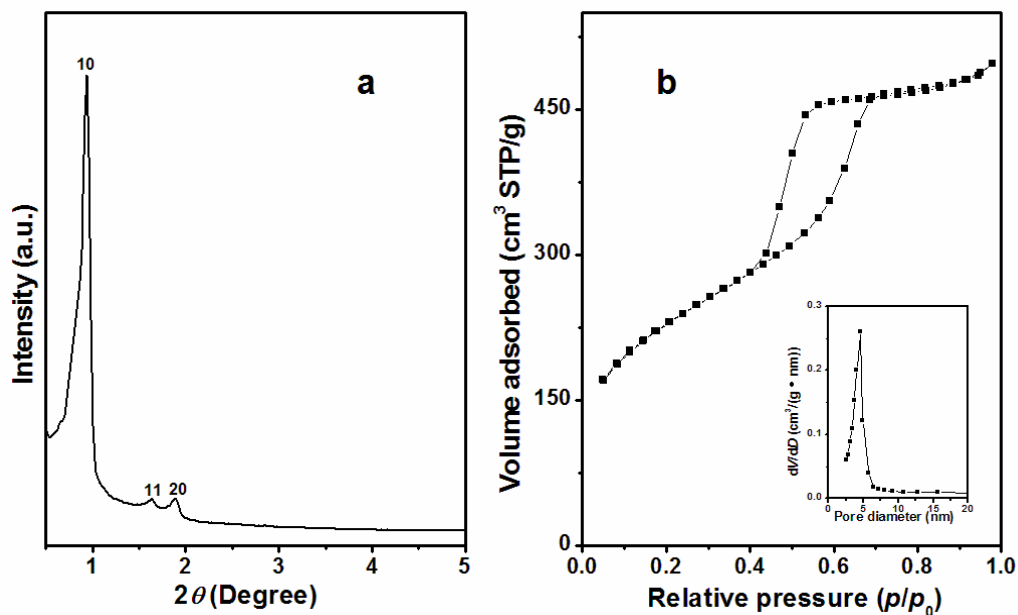

Fig. S4 FT-IR spectra for as-prepared and calcined mesoporous silica.

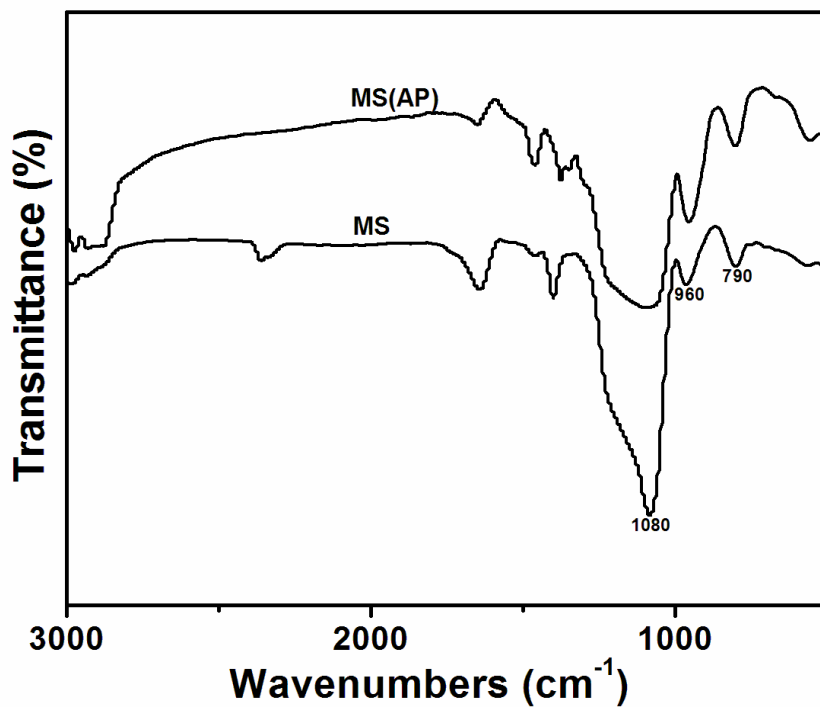

Fig. S5 TG curve for as-prepared mesoporous silica SBA-15 which is carried out in air.

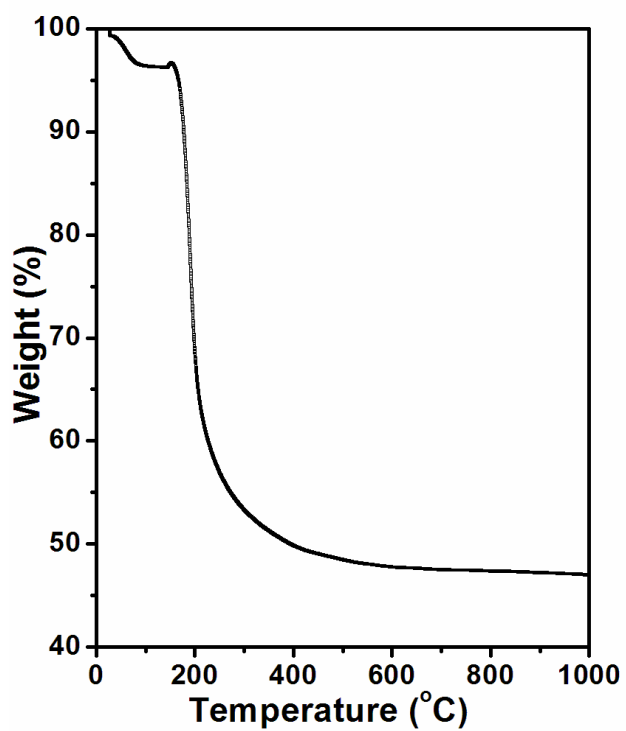

Fig. S6 (a) Small-angle and (b) wide-angle XRD patterns for as-prepared (MS(AP)) and calcined mesoporous silica (MS).

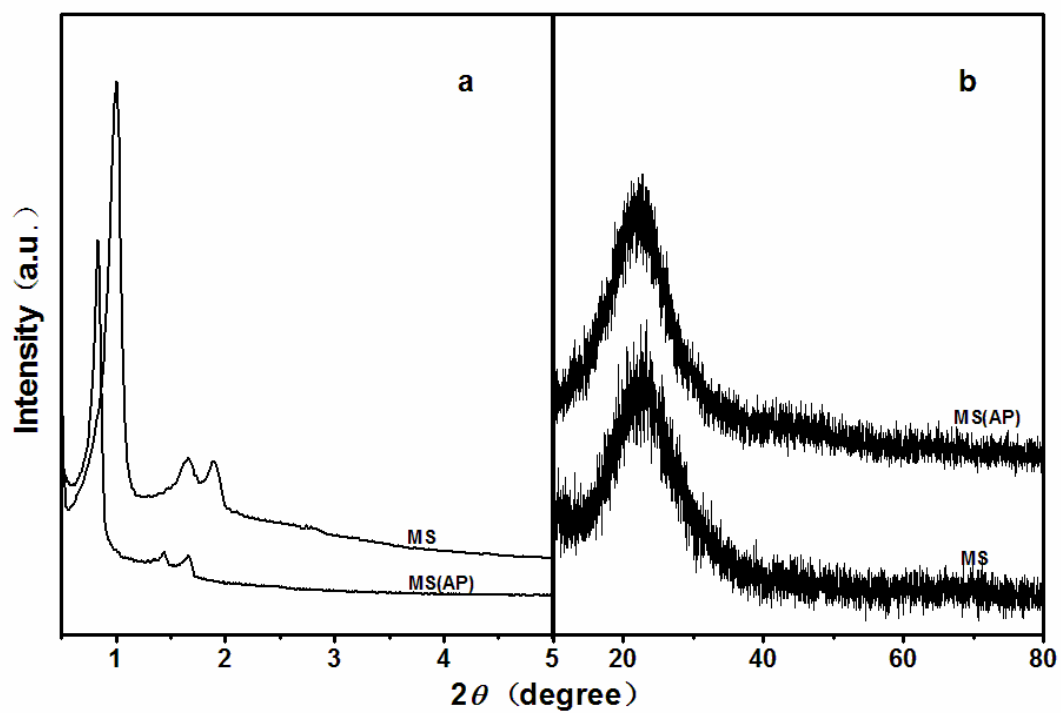

Fig. S7 (a) N<sub>2</sub> sorption isotherms and (b) pore-size distribution curves for as-prepared and calcined mesoporous silica.

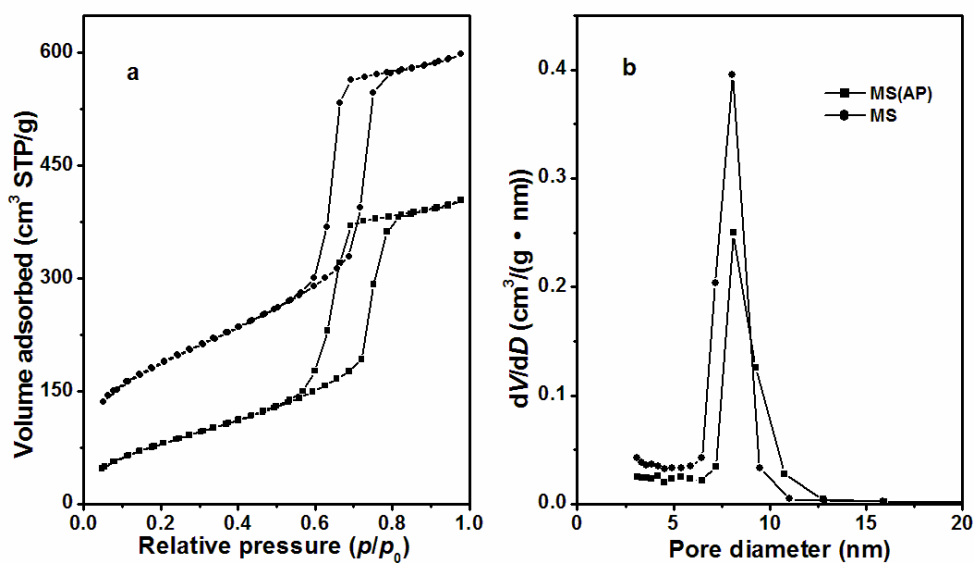

Supplement: b925864g.pdf [file b925864g.pdf]
